# Supplementary material
Source: PubMed Central journal article supplement (PMC3122863)
Supplement: supp_49_4_1245__2.pdf [file supp_49_4_1245__2.pdf]

**Supplemental Fig. 1B.** Alignment of the RtxA deduced amino acid sequences of strain 269-492 with 31 *Kingella kingae* clinical strains. The sequences were aligned by using the multiple sequence alignment with hierarchical clustering: <http://multalin.toulouse.inra.fr/multalin/> (\$). High and low consensus sequences are in red and blue, respectively.

¤, residue identical in all the proteins while single nucleotide polymorphism(s) was observed in the corresponding codon.

•, residue polymorphism.

Insertion of the repeated sequence “RAGQAGVQALN” is underlined.

|            | 1   | • | • |   | • | ¤¤ | 100 |   |   |   |   |   |   |   |   |   |   |   |   |   |       |   |   |   |   |   |   |   |   |   |   |   |   |   |   |   |   |   |   |   |   |   |   |   |   |   |   |   |   |   |   |   |   |   |   |   |   |   |   |   |   |   |   |   |   |   |   |   |   |   |   |   |   |   |   |   |
|------------|-----|---|---|---|---|----|-----|---|---|---|---|---|---|---|---|---|---|---|---|---|-------|---|---|---|---|---|---|---|---|---|---|---|---|---|---|---|---|---|---|---|---|---|---|---|---|---|---|---|---|---|---|---|---|---|---|---|---|---|---|---|---|---|---|---|---|---|---|---|---|---|---|---|---|---|---|---|
| 269-492    | MNL | A | T | T | K | A  | K   | L | K | S | G | A | Q | A | G | V | Q | A | L | N | ----- | K | A | G | H | A | A | K | T | G | T | V | A | A | G | K | A | T | V | A | G | A | K | S | L | Y | L | T | I | P | K | D | Y | D | I | E | K | G | G | S | L | N | E | L | I | K | A | A | E | L | G | I | A | R | L | Q |
| A2471      | MNL | A | T | T | K | A  | K   | L | K | S | G | A | Q | A | G | V | Q | A | L | N | ----- | K | A | G | H | A | A | K | T | G | T | V | A | A | G | K | A | T | V | A | G | A | K | S | L | Y | L | T | I | P | K | D | Y | D | I | E | K | G | G | S | L | N | E | L | I | K | A | A | E | L | G | I | A | R | L | Q |
| 449-79     | MNL | A | T | T | K | A  | K   | L | K | S | G | A | Q | A | G | V | Q | A | L | N | ----- | K | A | G | H | A | A | K | T | G | T | V | A | A | G | K | A | T | V | A | G | A | K | S | L | Y | L | T | I | P | K | D | Y | D | I | E | K | G | G | S | L | N | E | L | I | K | A | A | E | L | G | I | A | R | L | Q |
| 19477      | MNL | A | T | T | K | A  | K   | L | K | S | G | A | Q | A | G | V | Q | A | L | N | ----- | K | A | G | H | A | A | K | T | G | T | V | A | A | G | K | A | T | V | A | G | A | K | S | L | Y | L | T | I | P | K | D | Y | D | I | E | K | G | G | S | L | N | E | L | I | K | A | A | E | L | G | I | A | R | L | Q |
| 116811     | MNL | A | T | T | K | A  | K   | L | K | S | G | A | Q | A | G | V | Q | A | L | N | ----- | K | A | G | H | A | A | K | T | G | T | V | A | A | G | K | A | T | V | A | G | A | K | S | L | Y | L | T | I | P | K | D | Y | D | I | E | K | G | G | S | L | N | E | L | I | K | A | A | E | L | G | I | A | R | L | Q |
| Cle        | MNL | A | T | T | K | A  | K   | L | K | S | G | A | Q | A | G | V | Q | A | L | N | ----- | K | A | G | H | A | A | K | T | G | T | V | A | A | G | K | A | T | V | A | G | A | K | S | L | Y | L | T | I | P | K | D | Y | D | I | E | K | G | G | S | L | N | E | L | I | K | A | A | E | L | G | I | A | R | L | Q |
| 553.85     | MNL | A | T | T | K | A  | K   | L | K | S | G | A | Q | A | G | V | Q | A | L | N | ----- | K | A | G | H | A | A | K | T | G | T | V | A | A | G | K | A | T | V | A | G | A | K | S | L | Y | L | T | I | P | K | D | Y | D | I | E | K | G | G | S | L | N | E | L | I | K | A | A | E | L | G | I | A | R | L | Q |
| 5530       | MNL | A | T | T | K | A  | K   | L | K | S | G | A | Q | A | G | V | Q | A | L | N | ----- | K | A | G | H | A | A | K | T | G | T | V | A | A | G | K | A | T | V | A | G | A | K | S | L | Y | L | T | I | P | K | D | Y | D | I | E | K | G | G | S | L | N | E | L | I | K | A | A | E | L | G | I | A | R | L | Q |
| 2941       | MNL | A | T | T | K | A  | K   | L | K | S | G | A | Q | A | G | V | Q | A | L | N | ----- | K | A | G | H | A | A | K | T | G | T | V | A | A | G | K | A | T | V | A | G | A | K | S | L | Y | L | T | I | P | K | D | Y | D | I | E | K | G | G | S | L | N | E | L | I | K | A | A | E | L | G | I | A | R | L | Q |
| 266278-745 | MNL | A | T | T | K | A  | K   | L | K | S | G | A | Q | A | G | V | Q | A | L | N | ----- | K | A | G | H | A | A | K | T | G | T | V | A | A | G | K | A | T | V | A | G | A | K | S | L | Y | L | T | I | P | K | D | Y | D | I | E | K | G | G | S | L | N | E | L | I | K | A | A | E | L | G | I | A | R | L | Q |
| 6079-2197  | MNL | A | T | T | K | A  | K   | L | K | S | G | A | Q | A | G | V | Q | A | L | N | ----- | K | A | G | H | A | A | K | T | G | T | V | A | A | G | K | A | T | V | A | G | A | K | S | L | Y | L | T | I | P | K | D | Y | D | I | E | K | G | G | S | L | N | E | L | I | K | A | A | E | L | G | I | A | R | L | Q |
| 6307-2010  | MNL | A | T | T | K | A  | K   | L | K | S | G | A | Q | A | G | V | Q | A | L | N | ----- | K | A | G | H | A | A | K | T | G | T | V | A | A | G | K | A | T | V | A | G | A | K | S | L | Y | L | T | I | P | K | D | Y | D | I | E | K | G | G | S | L | N | E | L | I | K | A | A | E | L | G | I | A | R | L | Q |
| 112175     | MNL | A | T | T | K | A  | K   | L | K | S | G | A | Q | A | G | V | Q | A | L | N | ----- | K | A | G | H | A | A | K | T | G | T | V | A | A | G | K | A | T | V | A | G | A | K | S | L | Y | L | T | I | P | K | D | Y | D | I | E | K | G | G | S | L | N | E | L | I | K | A | A | E | L | G | I | A | R | L | Q |
| 112621     | MNL | A | T | T | K | A  | K   | L | K | S | G | A | Q | A | G | V | Q | A | L | N | ----- | K | A | G | H | A | A | K | T | G | T | V | A | A | G | K | A | T | V | A | G | A | K | S | L | Y | L | T | I | P | K | D | Y | D | I | E | K | G | G | S | L | N | E | L | I | K | A | A | E | L | G | I | A | R | L | Q |
| 5077-535   | MNL | A | T | T | K | A  | K   | L | K | S | G | A | Q | A | G | V | Q | A | L | N | ----- | K | A | G | H | A | A | K | T | G | T | V | A | A | G | K | A | T | V | A | G | A | K | S | L | Y | L | T | I | P | K | D | Y | D | I | E | K | G | G | S | L | N | E | L | I | K | A | A | E | L | G | I | A | R | L | Q |
| 119951     | MNL | A | T | T | K | A  | K   | L | K | S | G | A | Q | A | G | V | Q | A | L | N | ----- | K | A | G | H | A | A | K | T | G | T | V | A | A | G | K | A | T | V | A | G | A | K | S | L | Y | L | T | I | P | K | D | Y | D | I | E | K | G | G | S | L | N | E | L | I | K | A | A | E | L | G | I | A | R | L | Q |
| 113899     | MNL | A | T | T | K | A  | K   | L | K | S | G | A | Q | A | G | V | Q | A | L | N | ----- | K | A | G | H | A | A | K | T | G | T | V | A | A | G | K | A | T | V | A | G | A | K | S | L | Y | L | T | I | P | K | D | Y | D | I | E | K | G | G | S | L | N | E | L | I | K | A | A | E | L | G | I | A | R | L | Q |
| 110733     | MNL | A | T | T | K | A  | K   | L | K | S | G | A | Q | A | G | V | Q | A | L | N | ----- | K | A | G | H | A | A | K | T | G | T | V | A | A | G | K | A | T | V | A | G | A | K | S | L | Y | L | T | I | P | K | D | Y | D | I | E | K | G | G | S | L | N | E | L | I | K | A | A | E | L | G | I | A | R | L | Q |
| 08/09-BRIH | MNL | A | T | T | K | A  | K   | L | K | S | G | A | Q | A | G | V | Q | A | L | N | ----- | K | A | G | H | A | A | K | T | G | T | V | A | A | G | K | A | T | V | A | G | A | K | S | L | Y | L | T | I | P | K | D | Y | D | I | E | K | G | G | S | L | N | E | L | I | K | A | A | E | L | G | I | A | R | L | Q |
| 6238-761   | MNL | A | T | T | K | A  | K   | L | K | S | G | A | Q | A | G | V | Q | A | L | N | ----- | K | A | G | H | A | A | K | T | G | T | V | A | A | G | K | A | T | V | A | G | A | K | S | L | Y | L | T | I | P | K | D | Y | D | I | E | K | G | G | S | L | N | E | L | I | K | A | A | E | L | G | I | A | R | L | Q |
| 507-9849   | MNL | A | T | T | K | A  | K   | L | K | S | G | A | Q | A | G | V | Q | A | L | N | ----- | K | A | G | H | A | A | K | T | G | T | V | A | A | G | K | A | T | V | A | G | A | K | S | L | Y | L | T | I | P | K | D | Y | D | I | E | K | G | G | S | L | N | E | L | I | K | A | A | E | L | G | I | A | R | L | Q |
| 127598     | MNL | A | T | T | K | A  | K   | L | K | S | G | A | Q | A | G | V | Q | A | L | N | ----- | K | A | G | H | A | A | K | T | G | T | V | A | A | G | K | A | T | V | A | G | A | K | S | L | Y | L | T | I | P | K | D | Y | D | I | E | K | G | G | S | L | N | E | L | I | K | A | A | E | L | G | I | A | R | L | Q |
| 474-86     | MNL | A | T | T | K | A  | K   | L | K | S | G | A | Q | A | G | V | Q | A | L | N | ----- | K | A | G | H | A | A | K | T | G | T | V | A | A | G | K | A | T | V | A | G | A | K | S | L | Y | L | T | I | P | K | D | Y | D | I | E | K | G | G | S | L | N | E | L | I | K | A | A | E | L | G | I | A | R | L | Q |
| 475-86     | MNL | A | T | T | K | A  | K   | L | K | S | G | A | Q | A | G | V | Q | A | L | N | ----- | K | A | G | H | A | A | K | T | G | T | V | A | A | G | K | A | T | V | A | G | A | K | S | L | Y | L | T | I | P | K | D | Y | D | I | E | K | G | G | S | L | N | E | L | I | K | A | A | E | L | G | I | A | R | L | Q |
| 4177/66    | MNL | A | T | T | K | A  | K   | L | K | S | G | A | Q | A | G | V | Q | A | L | N | ----- | K | A | G | H | A | A | K | T | G | T | V | A | A | G | K | A | T | V | A | G | A | K | S | L | Y | L | T | I | P | K | D | Y | D | I | E | K | G | G | S | L | N | E |   |   |   |   |   |   |   |   |   |   |   |   |   |

269-492 EDANNIESAKKSIDTVEKLLSFTQTGVAVSAKKLDELLQKYSSSQLAKSLGSSANIDSKLTKTNHILSTLSSFLGTALAGMDLDSLKVQGDASATDLAKA  
A2471 EDANNIESAKKSIDTVEKLLSFTQTGVAVSAKKLDELLQKYSSSQLAKSLGSSANIDSKLTKTNHILSTLSSFLGTALAGMDLDSLKVQGDASATDLAKA  
449-79 EDANNIESAKKSIDTVEKLLSFTQTGVAVSAKKLDELLQKYSSSQLAKSLGSSANIDSKLTKTNHILSTLSSFLGTALAGMDLDSLKVQGDASATDLAKA  
19477 EDANNIESAKKSIDTVEKLLSFTQTGVAVSAKKLDELLQKYSSSQLAKSLGSSANIDSKLTKTNHILSTLSSFLGTALAGMDLDSLKVQGDASATDLAKA  
116811 EDANNIESAKKSIDTVEKLLSFTQTGVAVSAKKLDELLQKYSSSQLAKSLGSSANIDSKLTKTNHILSTLSSFLGTALAGMDLDSLKVQGDASATDLAKA  
Cle EDANNIESAKKSIDTVEKLLSFTQTGVAVSAKKLDELLQKYSSSQLAKSLGSSANIDSKLTKTNHILSTLSSFLGTALAGMDLDSLKVQGDASATDLAKA  
553.85 EDANNIESAKKSIDTVEKLLSFTQTGVAVSAKKLDELLQKYSSSQLAKSLGSSANIDSKLTKTNHILSTLSSFLGTALAGMDLDSLKVQGDASATDLAKA  
5530 EDANNIESAKKSIDTVEKLLSFTQTGVAVSAKKLDELLQKYSSSQLAKSLGSSANIDSKLTKTNHILSTLSSFLGTALAGMDLDSLKVQGDASATDLAKA  
2941 EDANNIESAKKSIDTVEKLLSFTQTGVAVSAKKLDELLQKYSSSQLAKSLGSSANIDSKLTKTNHILSTLSSFLGTALAGMDLDSLKVQGDASATDLAKA  
266278-745 EDANNIESAKKSIDTVEKLLSFTQTGVAVSAKKLDELLQKYSSSQLAKSLGSSANIDSKLTKTNHILSTLSSFLGTALAGMDLDSLKVQGDASATDLAKA  
6079-2197 EDANNIESAKKSIDTVEKLLSFTQTGVAVSAKKLDELLQKYSSSQLAKSLGSSANIDSKLTKTNHILSTLSSFLGTALAGMDLDSLKVQGDASATDLAKA  
6307-2010 EDANNIESAKKSIDTVEKLLSFTQTGVAVSAKKLDELLQKYSSSQLAKSLGSSANIDSKLTKTNHILSTLSSFLGTALAGMDLDSLKVQGDASATDLAKA  
112175 EDANNIESAKKSIDTVEKLLSFTQTGVAVSAKKLDELLQKYSSSQLAKSLGSSANIDSKLTKTNHILSTLSSFLGTALAGMDLDSLKVQGDASATDLAKA  
112621 EDANNIESAKKSIDTVEKLLSFTQTGVAVSAKKLDELLQKYSSSQLAKSLGSSANIDSKLTKTNHILSTLSSFLGTALAGMDLDSLKVQGDASATDLAKA  
5077-535 EDANNIESAKKSIDTVEKLLSFTQTGVAVSAKKLDELLQKYSSSQLAKSLGSSANIDSKLTKTNHILSTLSSFLGTALAGMDLDSLKVQGDASATDLAKA  
119951 EDANNIESAKKSIDTVEKLLSFTQTGVAVSAKKLDELLQKYSSSQLAKSLGSSANIDSKLTKTNHILSTLSSFLGTALAGMDLDSLKVQGDASATDLAKA  
113899 EDANNIESAKKSIDTVEKLLSFTQTGVAVSAKKLDELLQKYSSSQLAKSLGSSANIDSKLTKTNHILSTLSSFLGTALAGMDLDSLKVQGDASATDLAKA  
110733 EDANNIESAKKSIDTVEKLLSFTQTGVAVSAKKLDELLQKYSSSQLAKSLGSSANIDSKLTKTNHILSTLSSFLGTALAGMDLDSLKVQGDASATDLAKA  
08/09-BRIH EDANNIESAKKSIDTVEKLLSFTQTGVAVSAKKLDELLQKYSSSQLAKSLGSSANIDSKLTKTNHILSTLSSFLGTALAGMDLDSLKVQGDASATDLAKA  
6238-761 EDANNIESAKKSIDTVEKLLSFTQTGVAVSAKKLDELLQKYSSSQLAKSLGSSANIDSKLTKTNHILSTLSSFLGTALAGMDLDSLKVQGDASATDLAKA  
507-9849 EDANNIESAKKSIDTVEKLLSFTQTGVAVSAKKLDELLQKYSSSQLAKSLGSSANIDSKLTKTNHILSTLSSFLGTALAGMDLDSLKVQGDASATDLAKA  
127598 EDANNIESAKKSIDTVEKLLSFTQTGVAVSAKKLDELLQKYSSSQLAKSLGSSANIDSKLTKTNHILSTLSSFLGTALAGMDLDSLKVQGDASATDLAKA  
474-86 EDANNIESAKKSIDTVEKLLSFTQTGVAVSAKKLDELLQKYSSSKLAKSLGSSANIDSKLTKTNHILSTLSSFLGTALAGMDLDSLKVQGDASATDLAKA  
475-86 EDANNIESAKKSIDTVEKLLSFTQTGVAVSAKKLDELLQKYSSSKLAKSLGSSANIDSKLTKTNHILSTLSSFLGTALAGMDLDSLKVQGDASATDLAKA  
4177/66 EDANNIESAKKSIDTVEKLLSFTQTGVAVSAKKLDELLQKYSSSKLAKSLGSSANIDSKLTKTNHILSTLSSFLGTALAGMDLDSLKVQGDASATDLAKA  
166739 EDANNIESAKKSIDTVEKLLSFTQTGVAVSAKKLDELLQKYSSSKLAKSLGSSANIDSKLTKTNHILSTLSSFLGTALAGMDLDSLKVQGDASATDLAKA  
0608-14156 EDANNIESAKKSIDTVEKLLSFTQTGVAVSAKKLDELLQKYSSSQLAKSLGSSANIDSKLTKTNHILSTLSSFLGTALAGMDLDSLKVQGDASATDLAKA  
12-05-04-M EDANNIESAKKSIDTVEKLLSFTQTGVAVSAKKLDELLQKYSSSQLAKSLGSSANIDSKLTKTNHILSTLSSFLGTALAGMDLDSLKVQGDASATDLAKA  
0801-26093 EDANNIESAKKSIDTVEKLLSFTQTGVAVSAKKLDELLQKYSSSQLAKSLGSSANIDSKLTKTNHILSTLSSFLGTALAGMDLDSLKVQGDASATDLAKA  
508-1766 EDANNIESAKKSIDTVEKLLSFTQTGVAVSAKKLDELLQKYSSSQLAKSLGSSANIDSKLTKTNHILSTLSSFLGTALAGMDLDSLKVQGDASATDLAKA  
507-1756 EDANNIESAKKSIDTVEKLLSFTQTGVAVSAKKLDELLQKYSSSQLAKSLGSSANIDSKLTKTNHILSTLSSFLGTALAGMDLDSLKVQGDASATDLAKA  
112222 EDANNIESAKKSIDTVEKLLSFTQTGVAVSAKKLDELLQKYSSSQLAKSLGSSANIDSKLTKTNHILSTLSSFLGTALAGMDLDSLKVQGDASATDLAKA  
Consensus EDANNIESAKKSIDTVEKLLSFTQTGVAVSAKKLDELLQKYSSSQLAKSLGSSANIDSKLTKTNHILSTLSSFLGTALAGMDLDSLKVQGDASATDLAKA

269-492 SLDLINELVNNISNSVQSI EAFSEQLGRLGAAISQTKGLSGLGNKLQNLPNFGKANLALEMI SGLLSGI SAGFTLADKNASTEKKVAAGFELSNQVIGNV  
 A2471 SLDLINELVNNISNSVQSI EAFSEQLGRLGAAISQTKGLSGLGNKLQNLPNFGKANLALEMI SGLLSGI SAGFTLADKNASTEKKVAAGFELSNQVIGNV  
 449-79 SLDLINELVNNISNSVQSI EAFSEQLGRLGAAISQTKGLSGLGNKLQNLPNFGKANLALEMI SGLLSGI SAGFTLADKNASTEKKVAAGFELSNQVIGNV  
 19477 SLDLINELVNNISNSVQSI EAFSEQLGRLGAAISQTKGLSGLGNKLQNLPNFGKANLALEMI SGLLSGI SAGFTLADKNASTEKKVAAGFELSNQVIGNV  
 116811 SLDLINELVNNISNSVQSI EAFSEQLGRLGAAISQTKGLSGLGNKLQNLPNFGKANLALEMI SGLLSGI SAGFTLADKNASTEKKVAAGFELSNQVIGNV  
 Cle SLDLINELVNNISNSVQSI EAFSEQLGRLGAAISQTKGLSGLGNKLQNLPNFGKANLALEMI SGLLSGI SAGFTLADKNASTEKKVAAGFELSNQVIGNV  
 553.85 SLDLINELVNNISNSVQSI EAFSEQLGRLGAAISQTKGLSGLGNKLQNLPNFGKANLALEMI SGLLSGI SAGFTLADKNASTEKKVAAGFELSNQVIGNV  
 5530 SLDLINELVNNISNSVQSI EAFSEQLGRLGAAISQTKGLSGLGNKLQNLPNFGKANL GLEMI SGLLSGI SAGFTLADKNASTEKKVAAGFELSNQVIGNV  
 2941 SLDLINELVNNISNSVQSI EAFSEQLGRLGAAISQTKGLSGLGNKLQNLPNFGKANL GLEMI SGLLSGI SAGFTLADKNASTEKKVAAGFELSNQVIGNV  
 266278-745 SLDLINELVNNISNSVQSI EAFSEQLGRLGAAISQTKGLSGLGNKLQNLPNFGKANL GLEMI SGLLSGI SAGFTLADKNASTEKKVAAGFELSNQVIGNV  
 6079-2197 SLDLINELVNNISNSVQSI EAFSEQLGRLGAAISQTKGLSGLGNKLQNLPNFGKANL GLEMI SGLLSGI SAGFTLADKNASTEKKVAAGFELSNQVIGNV  
 6307-2010 SLDLINELVNNISNSVQSI EAFSEQLGRLGAAISQTKGLSGLGNKLQNLPNFGKANL GLEMI SGLLSGI SAGFTLADKNASTEKKVAAGFELSNQVIGNV  
 112175 SLDLINELVNNISNSVQSI EAFSEQLGRLGAAISQTKGLSGLGNKLQNLPNFGKANL GLEMI SGLLSGI SAGFTLADKNASTEKKVAAGFELSNQVIGNV  
 112621 SLDLINELVNNISNSVQSI EAFSEQLGRLGAAISQTKGLSGLGNKLQNLPNFGKANL GLEMI SGLLSGI SAGFTLADKNASTEKKVAAGFELSNQVIGNV  
 5077-535 SLDLINELVNNISNSVQSI EAFSEQLGRLGAAISQTKGLSGLGNKLQNLPNFGKANL GLEMI SGLLSGI SAGFTLADKNASTEKKVAAGFELSNQVIGNV  
 119951 SLDLINELVNNISNSVQSI EAFSEQLGRLGAAISQTKGLSGLGNKLQNLPNFGKANL GLEMI SGLLSGI SAGFTLADKNASTEKKVAAGFELSNQVIGNV  
 113899 SLDLINELVNNISNSVQSI EAFSEQLGRLGAAISQTKGLSGLGNKLQNLPNFGKANL GLEMI SGLLSGI SAGFTLADKNASTEKKVAAGFELSNQVIGNV  
 110733 SLDLINELVNNISNSVQSI EAFSEQLGRLGAAISQTKGLSGLGNKLQNLPNFGKANL GLEMI SGLLSGI SAGFTLADKNASTEKKVAAGFELSNQVIGNV  
 08/09-BRIH SLDLINELVNNISNSVQSI EAFSEQLGRLGAAISQTKGLSGLGNKLQNLPNFGKANL GLEMI SGLLSGI SAGFTLADKNASTEKKVAAGFELSNQVIGNV  
 6238-761 SLDLINELVNNISNSVQSI EAFSEQLGRLGAAISQTKGLSGLGNKLQNLPNFGKANL GLEMI SGLLSGI SAGFTLADKNASTEKKVAAGFELSNQVIGNV  
 507-9849 SLDLINELVNNISNSVQSI EAFSEQLGRLGAAISQTKGLSGLGNKLQNLPNFGKANL GLEMI SGLLSGI SAGFTLADKNASTEKKVAAGFELSNQVIGNV  
 127598 SLDLINELVNNISNSVQSI EAFSEQLGRLGAAISQTKGLSGLGNKLQNLPNFGKANL GLEMI SGLLSGI SAGFTLADKNASTEKKVAAGFELSNQVIGNV  
 474-86 SLDLINELVNNISNSVQSI EAFSEQLGRLGAAISQTKGLSGLGNKLQNLPNFGKANL GLEMI SGLLSGI SAGFTLADKNASTEKKVAAGFELSNQVIGNV  
 475-86 SLDLINELVNNISNSVQSI EAFSEQLGRLGAAISQTKGLSGLGNKLQNLPNFGKANL GLEMI SGLLSGI SAGFTLADKNASTEKKVAAGFELSNQVIGNV  
 4177/66 SLDLINELVNNISNSVQSI EAFSEQLGRLGAAISQTKGLSGLGNKLQNLPNFGKANLALEMI SGLLSGI SAGFTLADKNASTEKKVAAGFELSNQVIGNV  
 166739 SLDLINELVNNISNSVQSI EAFSEQLGRLGAAISQTKGLSGLGNKLQNLPNFGKANLALEMI SGLLSGI SAGFTLADKNASTEKKVAAGFELSNQVIGNV  
 0608-14156 SLDLINELVNNISNSVQSI EAFSEQLGRLGAAISQTKGLSGLGNKLQNLPNFGKANL GLEMI SGLLSGI SAGFTLADKNASTEKKVAAGFELSNQVIGNV  
 12-05-04-M SLDLINELVNNISNSVQSI EAFSEQLGRLGAAISQTKGLSGLGNKLQNLPNFGKANL GLEMI SGLLSGI SAGFTLADKNASTEKKVAAGFELSNQVIGNV  
 0801-26093 SLDLINELVNNISNSVQSI EAFSEQLGRLGAAISQTKGLSGLGNKLQNLPNFGKANL GLEMI SGLLSGI SAGFTLADKNASTEKKVAAGFELSNQVIGNV  
 508-1766 SLDLINELVNNISNSVQSI EAFSEQLGRLGAAISQTKGLSGLGNKLQNLPNFGKANL GLEMI SGLLSGI SAGFTLADKNASTEKKVAAGFELSNQVIGNV  
 507-1756 SLDLINELVNNISNSVQSI EAFSEQLGRLGAAISQTKGLSGLGNKLQNLPNFGKANL GLEMI SGLLSGI SAGFTLADKNASTEKKVAAGFELSNQVIGNV  
 112222 SLDLINELVNNISNSVQSI EAFSEQLGRLGAAISQTKGLSGLGNKLQNLPNFGKANL GLEMI SGLLSGI SAGFTLADKNASTEKKVAAGFELSNQVIGNV  
 Consensus SLDLINELVNNISNSVQSI EAFSEQLGRLGAAISQTKGLSGLGNKLQNLPNFGKANL GLEMI SGLLSGI SAGFTLADKNASTEKKVAAGFELSNQVIGNV

269-492 TKAISSYVLAQRAAAGLSTTGAVASLITASIMLAIS  
A2471 TKAISSYVLAQRAAAGLSTTGAVASLITASIMLAIS  
449-79 TKAISSYVLAQRAAAGLSTTGAVASLITASIMLAIS  
19477 TKAISSYVLAQRAAAGLSTTGAVASLITASIMLAIS  
116811 TKAISSYVLAQRAAAGLSTTGAVASLITASIMLAIS  
Cle TKAISSYVLAQRAAAGLSTTGAVASLITASIMLAIS  
553.85 TKAISSYVLAQRAAAGLSTTGAVASLITASIMLAIS  
5530 TKAISSYVLAQRAAAGLSTTGAVASLITASIMLAIS  
2941 TKAISSYVLAQRAAAGLSTTGAVASLITASIMLAIS  
266278-745 TKAISSYVLAQRAAAGLSTTGAVASLITASIMLAIS  
6079-2197 TKAISSYVLAQRAAAGLSTTGAVASLITASIMLAIS  
6307-2010 TKAISSYVLAQRAAAGLSTTGAVASLITASIMLAIS  
112175 TKAISSYVLAQRAAAGLSTTGAVASLITASIMLAIS  
112621 TKAISSYVLAQRAAAGLSTTGAVASLITASIMLAIS  
5077-535 TKAISSYVLAQRAAAGLSTTGAVASLITASIMLAIS  
119951 TKAISSYVLAQRAAAGLSTTGAVASLITASIMLAIS  
113899 TKAISSYVLAQRAAAGLSTTGAVASLITASIMLAIS  
110733 TKAISSYVLAQRAAAGLSTTGAVASLITASIMLAIS  
08/09-BRIH TKAISSYVLAQRAAAGLSTTGAVASLITASIMLAIS  
6238-761 TKAISSYVLAQRAAAGLSTTGAVASLITASIMLAIS  
507-9849 TKAISSYVLAQRAAAGLSTTGAVASLITASIMLAIS  
127598 TKAISSYVLAQRAAAGLSTTGAVASLITASIMLAIS  
474-86 TKAISSYVLAQRAAAGLSTTGAVASLITASIMLAIS  
475-86 TKAISSYVLAQRAAAGLSTTGAVASLITASIMLAIS  
4177/66 TKAISSYVLAQRAAAGLSTTGAVASLITASIMLAIS  
166739 TKAISSYVLAQRAAAGLSTTGAVASLITASIMLAIS  
0608-14156 TKAISSYVLAQRAAAGLSTTGAVASLITASIMLAIS  
12-05-04-M TKAISSYVLAQRAAAGLSTTGAVASLITASIMLAIS  
0801-26093 TKAISSYVLAQRAAAGLSTTGAVASLITASIMLAIS  
508-1766 TKAISSYVLAQRAAAGLSTTGAVASLITASIMLAIS  
507-1756 TKAISSYVLAQRAAAGLSTTGAVASLITASIMLAIS  
112222 TKAISSYVLAQRAAAGLSTTGAVASLITASIMLAIS  
Consensus TKAISSYVLAQRAAAGLSTTGAVASLITASIMLAIS
